# Supplementary material for: Improved electrical conductivity of Co(ii) and Cu(ii) ladder polymers in the fabrication of photoresponsive Schottky devices
Source: Royal Society of Chemistry journal article supplement (doi:10.1039/d2ma00911k), 2022-11-10
Supplement: d2ma00911k2.pdf [file d2ma00911k2.pdf]

## Electronic Supplementary Information

# Improved electrical conductivity of Co(II) and Cu(II) ladder polymers in the fabrication of photoresponsive Schottky device

Basudeb Dutta,<sup>a,b,†</sup> Dhananjoy Das,<sup>c,†</sup> Kumari Raksha,<sup>a</sup> Chittaranjan Sinha,<sup>d</sup> Sumit Khanra,<sup>a\*</sup> Partha Pratim Ray<sup>c</sup> and Mohammad Hedayetullah Mir<sup>b\*</sup>

<sup>a</sup>Department of Chemical Sciences, Indian Institute of Science Education and Research Kolkata, Mohanpur, West Bengal 741246, India.

<sup>b</sup>Department of Chemistry, Aliah University, New Town, Kolkata 700 156, India.

<sup>c</sup>Department of Physics, Jadavpur University, Jadavpur, Kolkata 700 032, India.

<sup>d</sup>Department of Chemistry, Jadavpur University, Jadavpur, Kolkata 700 032, India.

To whom correspondence should be addressed. E-mails: [sumit.khanra@iiserkol.ac.in](mailto:sumit.khanra@iiserkol.ac.in) and [chmmir@gmail.com](mailto:chmmir@gmail.com)

<sup>†</sup>These authors contributed equally

## Experimental Section

### Materials

All of the chemicals were purchased from different chemical company and used as was. High purity cobalt(II) nitrate hexahydrate and copper(II) nitrate trihydrate were collected in their pure state for the crystallization process. All other chemicals and solvents were collected as AR grade. It is also stated that above chemicals were utilized in this analysis without any further purification.

### General methods

Elemental analyses (carbon, hydrogen, and nitrogen) of all the compounds were performed using a Perkin–Elmer 240C elemental analyzer. Thermal analysis (TGA) was carried out on a Perkin-Elmer Pyris Diamond TG/DTA thermal analyzer under a nitrogen atmosphere (flow rate: 50 cm<sup>3</sup> min<sup>-1</sup>) at the temperature range of 30–810 °C with a heating rate of 10 °C/ min. X-ray powder diffraction (PXRD) patterns in different states of the sample were recorded on a Bruker D8 Discover instrument using Cu–K $\alpha$  radiation. UV-Vis spectra were collected using a Perkin-Elmer Lambda 25 spectrophotometer.

### Synthesis of compound Co-CP

A solution of bpd (0.042 g, 0.2 mmol) in MeOH (2 mL) was slowly and carefully layered onto a solution of Co(NO<sub>3</sub>)<sub>2</sub>·6H<sub>2</sub>O (0.058 g, 0.2 mmol), in H<sub>2</sub>O (2 mL) using a 2 mL 1 : 1 (= v/v) buffer solution of MeOH and H<sub>2</sub>O followed by layering of Hnac (0.023 g, 0.2 mmol) neutralized with Et<sub>3</sub>N (0.021 g, 0.2 mmol) in 2 mL EtOH. The brown colour block shaped crystals of [Co<sub>2</sub>(bpd)<sub>2</sub>(nac)<sub>2</sub>]·2CH<sub>3</sub>OH·H<sub>2</sub>O, (**Co-CP**) were obtained after three days (0.196 g, yield 70%). Elemental analysis (%) calcd for C<sub>78</sub>H<sub>68</sub>Co<sub>2</sub>N<sub>8</sub>O<sub>11</sub>: C 66.38, H 4.86, N7.94; found: C 66.39, H 4.58, N 7.93.

### Synthesis of compound Cu-CP

A solution of bpd (0.042 g, 0.2 mmol) in MeOH (2 mL) was slowly and carefully layered onto a solution of  $\text{Cu}(\text{NO}_3)_2 \cdot 3\text{H}_2\text{O}$  (0.048 g, 0.2 mmol), in  $\text{H}_2\text{O}$  (2 mL) using a 2 mL 1 : 1 (= v/v) buffer solution of  $\text{CH}_3\text{CN}$  and  $\text{H}_2\text{O}$  followed by layering of Hnac (0.023 g, 0.2 mmol) neutralized with  $\text{Et}_3\text{N}$  (0.021 g, 0.2 mmol) in 2 mL EtOH. The green colour Block shaped crystals of  $[\text{Cu}_2(\text{bpd})_2(\text{nac})_2] \cdot 2\text{CH}_3\text{CN} \cdot 2\text{H}_2\text{O}$ , (**Cu-CP**) were obtained after five days (0.275 g, yield 65%). Elemental analysis (%) calcd for  $\text{C}_{118}\text{H}_{94}\text{Cu}_3\text{N}_{14}\text{O}_{14}$ : C 66.77, H 4.46, N9.24; found: C 66.69, H 4.48, N 9.89.

### General X-ray Crystallography

Suitable shaped single crystals of CPs (**Co-CP** and **Cu-CP**) having suitable dimensions, were used for single crystal X-ray diffraction (SCXRD) and data collection using a Bruker SMART APEX II diffractometer furnished with graphite-monochromated  $\text{MoK}\alpha$  radiation ( $\lambda = 0.71073 \text{ \AA}$ ). The molecular arrangement of the single crystal was solved using the SHELXL-2016/6 package.<sup>1</sup> Non-hydrogen atoms of the diffracted compound were refined with anisotropic thermal parameters. The unit cell parameters and crystal-orientation matrices of the compound were determined by least-squares refinement of all reflections within hkl range  $-19 < h < 19$ ,  $-31 < k < 31$ ,  $-20 < l < 20$  (for **Co-CP**) and  $-16 < h < 16$ ,  $-18 < k < 18$ ,  $-18 < l < 18$ . All the hydrogen atoms were placed in their geometrically perfect positions and constrained to ride on their parent atoms. Collected data ( $I > 2\sigma(I)$ ) of crystal was integrated by employing the SAINT program and the absorption correction was performed through SADABS. The crystallographic data for CPs are summarized and depicted in Table S1 and S3. The selected bond lengths and bond angles around the coordination atmosphere of the metal ion are also given in Table S2 and S4.

**Table S1.** Crystal data and refinement parameters of **Co-CP**

|                                                                             |                                                                                |
|-----------------------------------------------------------------------------|--------------------------------------------------------------------------------|
| Formula                                                                     | C <sub>78</sub> H <sub>66</sub> Co <sub>2</sub> N <sub>8</sub> O <sub>11</sub> |
| fw                                                                          | 1411.26                                                                        |
| cryst syst                                                                  | Monoclinic                                                                     |
| space group                                                                 | C2/c                                                                           |
| <i>a</i> (Å)                                                                | 16.4018(15)                                                                    |
| <i>b</i> (Å)                                                                | 26.468(3)                                                                      |
| <i>c</i> (Å)                                                                | 16.8967(16)                                                                    |
| $\alpha$ (deg)                                                              | 90                                                                             |
| $\beta$ (deg)                                                               | 105.290(3)                                                                     |
| $\gamma$ (deg)                                                              | 90                                                                             |
| <i>V</i> (Å <sup>3</sup> )                                                  | 7075.7(12)                                                                     |
| <i>Z</i>                                                                    | 4                                                                              |
| <i>D</i> <sub>calcd</sub> (g/cm <sup>3</sup> )                              | 1.325                                                                          |
| $\mu$ (mm <sup>-1</sup> )                                                   | 0.536                                                                          |
| $\lambda$ (Å)                                                               | 0.71073                                                                        |
| total reflections                                                           | 6341                                                                           |
| refine parameters                                                           | 452                                                                            |
| GOF on <i>F</i> <sup>2</sup>                                                | 1.144                                                                          |
| final <i>R</i> indices [ <i>I</i> > 2 $\sigma$ ( <i>I</i> )] <sup>a,b</sup> | <i>R</i> 1 = 0.0536<br><i>wR</i> 2 = 0.1309                                    |

$$^a R1 = \sum ||F_o| - |F_c|| / \sum |F_o|, \quad ^b wR2 = [\sum w(F_o^2 - F_c^2)^2 / \sum w(F_o^2)^2]^{1/2}$$

**Table S2.** Selected bond lengths and bond angles in **Co-CP**

|         |          |             |          |
|---------|----------|-------------|----------|
| Co01-O1 | 2.209(2) | N1 -Co1 -O2 | 88.24(9) |
|---------|----------|-------------|----------|

|             |            |              |           |
|-------------|------------|--------------|-----------|
| Co01-O2     | 2.170(2)   | N4 -Co1 -O2  | 92.13(9)  |
| Co01-O3     | 2.012(2)   | O3 -Co1 -O1  | 91.52(9)  |
| Co01-O4     | 2.037(2)   | O4 -Co1 - O1 | 146.72(9) |
| Co01-N1     | 2.146(2)   | N1- Co1- O1  | 94.60(9)  |
| Co01-N4     | 2.152(2)   | N4- Co1- O1  | 87.29(9)  |
| O1 - C1     | 1.261(4)   | O2 -Co1- O1  | 59.52(8)  |
| O2 - C2     | 1.257(4)   | C24- N1- C23 | 117.5(3)  |
| O3 -Co1 -O4 | 121.76(10) | C24- N1- Co1 | 124.0(2)  |
| O3 -Co1 -N1 | 87.94(9)   | C23- N1- Co1 | 118.5(2)  |
| O4 -Co1- N1 | 86.61(9)   | C14- N4- C18 | 117.1(3)  |
| O3- Co1- N4 | 92.71(9)   | C14- N4- Co1 | 121.4(2)  |
| O4 -Co1 -N4 | 91.42(9)   | C18- N4- Co1 | 121.4(2)  |
| N1 -Co1 -N4 | 177.98(10) | C1- O1- Co1  | 89.6(2)   |
| O3 -Co1- O2 | 150.35(10) | C1- O2- Co1  | 91.5(2)   |
| O4 -Co1- O2 | 87.32(9)   | C26- O4- Co1 | 131.9(2)  |

**Table S3.** Crystal data and refinement parameters of **Cu-CP**

|         |                                 |
|---------|---------------------------------|
| Formula | $C_{118}H_{94}Cu_3N_{14}O_{14}$ |
|---------|---------------------------------|

|                                                                                    |                                             |
|------------------------------------------------------------------------------------|---------------------------------------------|
| fw                                                                                 | 2122.69                                     |
| crystalsyst                                                                        | Triclinic                                   |
| space group                                                                        | <i>P</i> -1                                 |
| <i>a</i> (Å)                                                                       | 13.7133(12)                                 |
| <i>b</i> (Å)                                                                       | 15.3391(13)                                 |
| <i>c</i> (Å)                                                                       | 15.7844(13)                                 |
| $\alpha$ (deg)                                                                     | 64.399(2)                                   |
| $\beta$ (deg)                                                                      | 76.000(3)                                   |
| $\gamma$ (deg)                                                                     | 63.866(2)                                   |
| <i>V</i> (Å <sup>3</sup> )                                                         | 2682.7(4)                                   |
| <i>Z</i>                                                                           | 1                                           |
| <i>D</i> <sub>calcd</sub> (g/cm <sup>3</sup> )                                     | 1.314                                       |
| $\mu$ (mm <sup>-1</sup> )                                                          | 0.659                                       |
| $\lambda$ (Å)                                                                      | 0.71073                                     |
| total reflections                                                                  | 9443                                        |
| refine parameters                                                                  | 680                                         |
| GOF on <i>F</i> <sup>2</sup>                                                       | 1.090                                       |
| final <i>R</i> indices [ <i>I</i> > 2 $\sigma$ ( <i>I</i> )] <sup><i>a,b</i></sup> | <i>R</i> 1 = 0.0599<br><i>wR</i> 2 = 0.1739 |

$${}^a R1 = \sum ||F_o| - |F_c|| / \sum |F_o|, {}^b wR2 = [\sum w(F_o^2 - F_c^2)^2 / \sum w(F_o^2)^2]^{1/2}$$

**Table S4.** Selected bond lengths and bond angles in **Cu-CP**

|              |          |                     |            |
|--------------|----------|---------------------|------------|
| Cu(1) - O(4) | 1.980(3) | O(4) - Cu(1) - O(5) | 126.43(12) |
|--------------|----------|---------------------|------------|

|                       |            |                       |            |
|-----------------------|------------|-----------------------|------------|
| Cu(1) - O(5)          | 2.534(4)   | O(4) - Cu(1) - O(6)   | 176.27(11) |
| Cu(1) - O(6)          | 1.990(3)   | O(4)- Cu(1) - N(1)    | 90.32(15)  |
| Cu(1) - N(1)          | 2.017(3)   | O(4) - Cu(1) - C(12)  | 154.21(13) |
| Cu(1) - N(4)d         | 2.027(3)   | O(4)- Cu(1) - N(4)d   | 91.91(12)  |
| Cu(1) - O(4)e         | 2.439(3)   | O(4) - Cu(1) - O(4)e  | 76.40(10)  |
| O(3) - C(25)          | 1.231(5)   | O(5) - Cu(1) - O(6)   | 57.24(12)  |
| O(4) - C(25)          | 1.288(5)   | O(5) - Cu(1) - N(1)   | 89.77(14)  |
| O(5) - C(12)          | 1.232(6)   | O(5) - Cu(1) - C(12)  | 27.82(14)  |
| O(6) - C(12)          | 1.298(5)   | O(5)- Cu(1) - N(4)d   | 85.10(13)  |
| N(1) - C(1)           | 1.332(5)   | O(5) - Cu(1) - O(4)e  | 157.16(12) |
| N(1) - C(5)           | 1.342(5)   | O(6) - Cu(1) - N(1)   | 88.98(15)  |
| N(1) - Cu(1) - C(12)  | 88.64(16)  | O(6) - Cu(1) - C(12)  | 29.43(13)  |
| N(1) - Cu(1) - N(4)d  | 174.77(12) | O(6)- Cu(1) - N(4)d   | 89.09(12)  |
| N(1) - Cu(1) - O(4)e  | 90.93(11)  | O(6) - Cu(1) - O(4)e  | 99.94(11)  |
| C(12) - Cu(1) - N(4)d | 87.29(14)  | C(12) - Cu(1) - O(4)e | 129.38(13) |
| N(4)d - Cu(1) - O(4)e | 94.20(11)  | Cu(1) - O(4) - C(25)  | 118.5(3)   |
| Cu(1) - O(4) - Cu(1)e | 103.60(11) | C(25) -O(4) - Cu(1)e  | 137.1(3)   |
| Cu(1) - O(5) - C(12)  | 78.5(3)    | Cu(1) - O(6) - C(12)  | 101.7(3)   |
| Cu(1) - N(1) - C(1)   | 122.0(3)   | C(7)- N(3)- N(2)      | 111.2(3)   |

Symmetry Code: d = x, 1+y, z; e = 1-x, 1-y, 2-z

**Table S5.** Comparison of conductivity with the reported works

| Sl. | Compounds | Electrical | Reference |
|-----|-----------|------------|-----------|
|-----|-----------|------------|-----------|

| No |                                                                                                                                                                                                                                                                                         | Conductivity<br>(S cm <sup>-1</sup> )                                                                                                                  |                  |
|----|-----------------------------------------------------------------------------------------------------------------------------------------------------------------------------------------------------------------------------------------------------------------------------------------|--------------------------------------------------------------------------------------------------------------------------------------------------------|------------------|
| 1. | <p>[Zn(ADC)(PBT)<sub>2</sub>(H<sub>2</sub>O)<sub>2</sub>]<sub>n</sub><br/> [Zn(Succ)(PBT)<sub>2</sub>(H<sub>2</sub>O)<sub>2</sub>]<sub>n</sub><br/> (H<sub>2</sub>ADC = acetylenedicarboxylic acid, H<sub>2</sub>Succ = succinic acid and PBT = 2-pyridin-4-ylbenzothiazole)</p>        | <p>1.31 × 10<sup>-4</sup><br/> 1.80 × 10<sup>-7</sup></p>                                                                                              | 2                |
| 2. | <p>[Zn(<i>cis</i>-1,4-chdc)(4-phpy)]<sub>n</sub><br/> [Zn(<i>cis</i>-1,4-chdc)(py)]<sub>n</sub><br/> (1,4-H<sub>2</sub>chdc = 1,4-cyclohexanedicarboxylic acid, 4-phpy = 4-phenylpyridine and py = pyridine)</p>                                                                        | <p>1.09 × 10<sup>-5</sup><br/> 6.01 × 10<sup>-7</sup></p>                                                                                              | 3                |
| 3. | <p>[Cd(2,2'-dsb)(4-nvp)(DMF)(H<sub>2</sub>O)]<br/> (H<sub>2</sub>,2'-dsba = 2,2'-disulfanediyldibenzoic acid and 4-nvp = 4-(1-naphthylvinyl)-pyridine)</p>                                                                                                                              | <p>6.60 × 10<sup>-6</sup> (Dark)<br/> 10.71 × 10<sup>-6</sup> (Light)</p>                                                                              | 4                |
| 4. | <p>[Fe<sup>II</sup>(pc)(μ-pyz)] and [Fe(pc)(μ-pyz)]<sub>2.54</sub><br/> [μ-pyz = pyrazine and pc = porphyrin ring]</p>                                                                                                                                                                  | <p>1 × 10<sup>-6</sup><br/> 2 × 10<sup>-1</sup></p>                                                                                                    | 5                |
| 5. | <p>Cu[Ni(pdt)<sub>2</sub>] (pdt = 2,3-pyrazinedithiolate)</p>                                                                                                                                                                                                                           | <p>1 × 10<sup>-4</sup></p>                                                                                                                             | 6                |
| 6. | <p>[Co<sub>3</sub>(NDC)<sub>3</sub>]<br/> (H<sub>2</sub>NDC = 2,6-naphthalenedicarboxylic acid)</p>                                                                                                                                                                                     | <p>1.8 × 10<sup>-6</sup></p>                                                                                                                           | 7                |
| 7. | <p>[Cu(fum)(4-phpy)<sub>2</sub>(H<sub>2</sub>O)] (H<sub>2</sub>fum = fumaric acid and 4-phpy = 4-phenyl pyridine)</p>                                                                                                                                                                   | <p>6.13 × 10<sup>-6</sup></p>                                                                                                                          | 8                |
| 8. | <p>[Co(C<sub>9</sub>H<sub>6</sub>NS)<sub>2</sub>] (C<sub>9</sub>H<sub>6</sub>NS = 8-mercaptoquinoline)</p>                                                                                                                                                                              | <p>1.7 × 10<sup>-7</sup></p>                                                                                                                           | 9                |
| 9. | <p>[Co<sub>2</sub>(bpd)<sub>2</sub>(nac)<sub>2</sub>]·2CH<sub>3</sub>OH·H<sub>2</sub>O<br/> and [Cu<sub>2</sub>(bpd)<sub>2</sub>(nac)<sub>2</sub>]·2CH<sub>3</sub>CN·2H<sub>2</sub>O<br/> (bpd = <i>N,N'</i>-bis(1-pyridine-4-yl-ethylidene) and Hnac = 3-(1-naphthyl)acrylic acid)</p> | <p>4.78×10<sup>-8</sup> (Dark)<br/> 6.15 × 10<sup>-8</sup> (Light)<br/> and<br/> 19.97 × 10<sup>-8</sup>(Dark)<br/> 70.61 × 10<sup>-8</sup>(Light)</p> | <b>This work</b> |



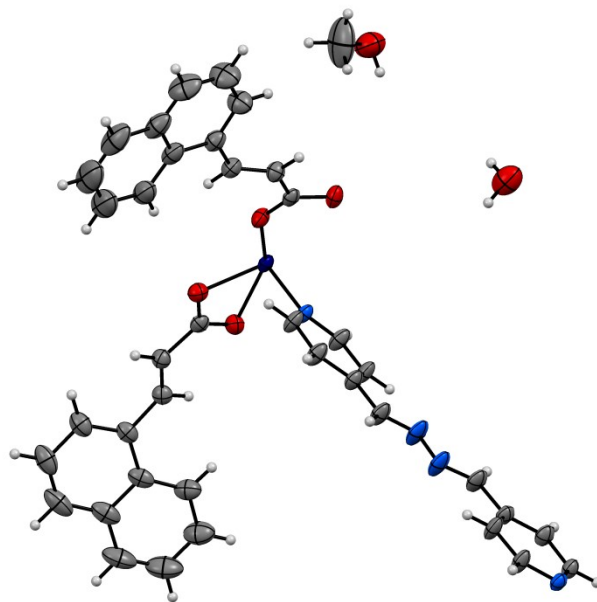

**Fig. S1** Asymmetric unit of **Co-CP** with 30% ellipsoid plot.

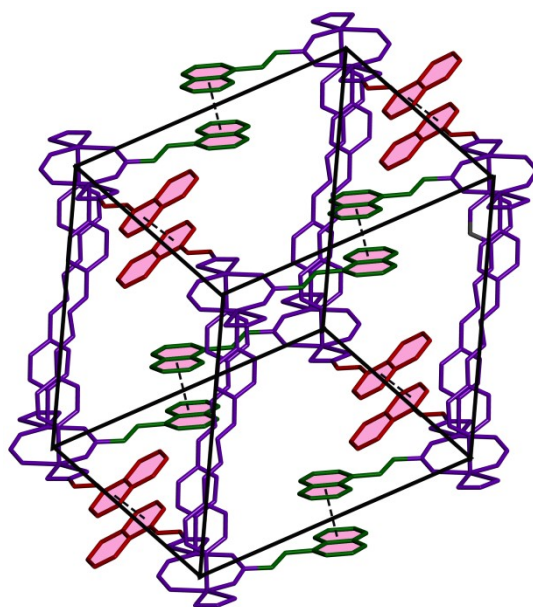

**Fig. S2** 3D supramolecular pillar-layered structure of **Co-CP** formed by  $\pi \cdots \pi$  stacking interactions.

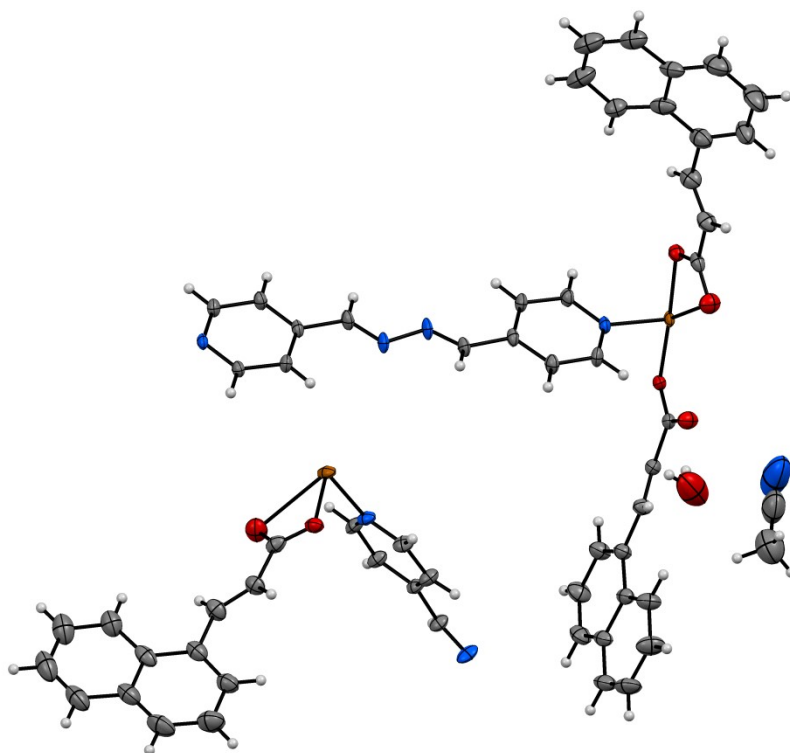

**Fig. S3** Asymmetric unit of **Cu-CP** with 30% ellipsoid plot.

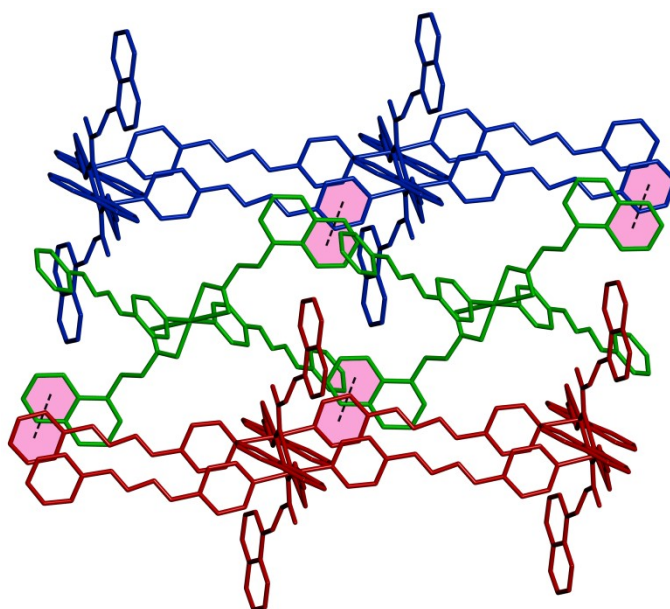

**Fig. S4** 3D supramolecular network of **Co-CP** formed by  $\pi \cdots \pi$  stacking interactions.

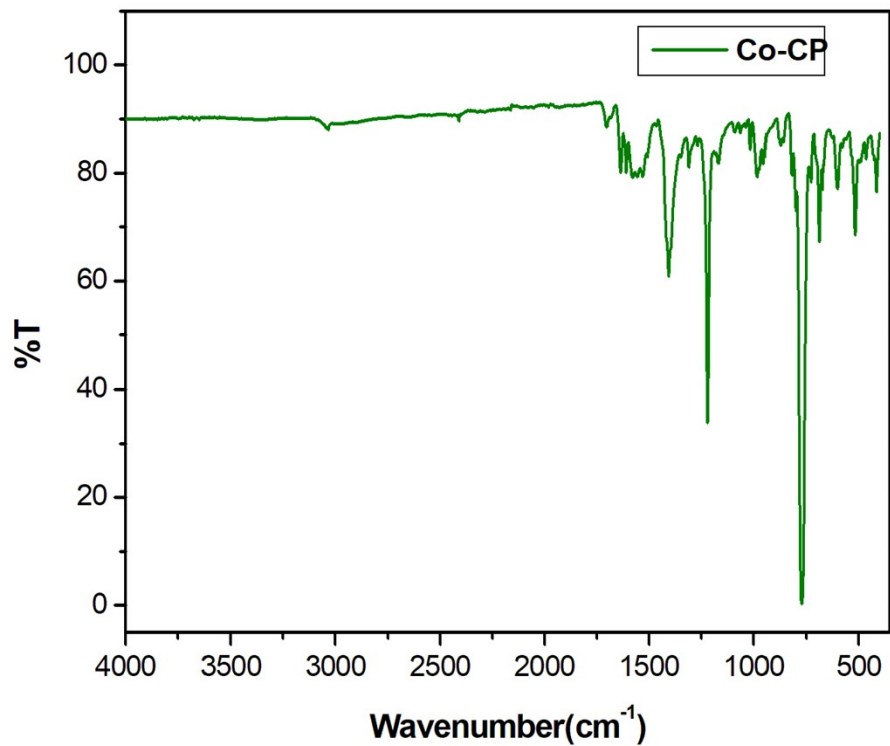

**Fig. S5** IR spectrum of Co-CP.

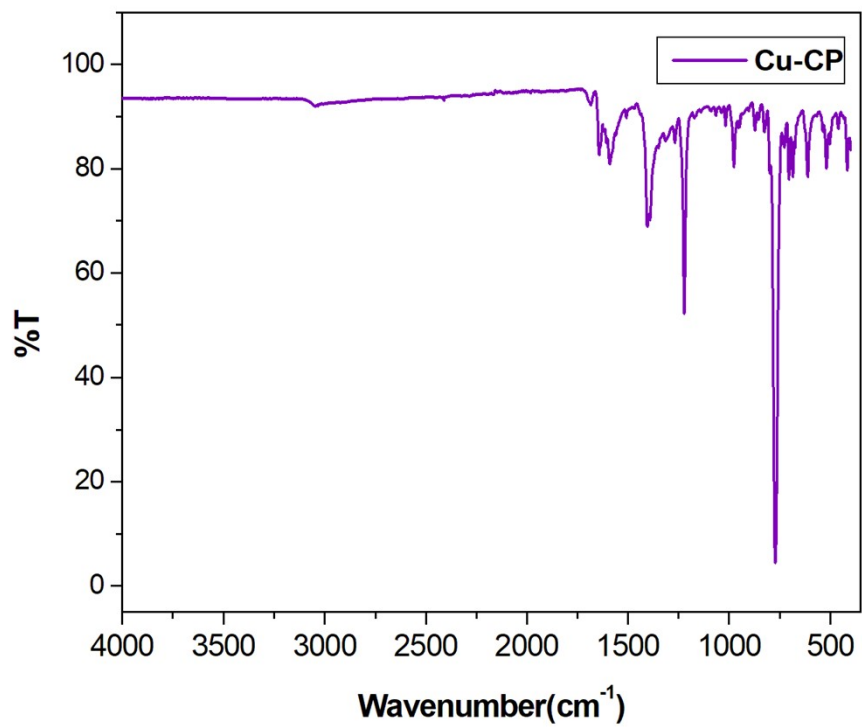

**Fig. S6** IR spectrum of Cu-CP.

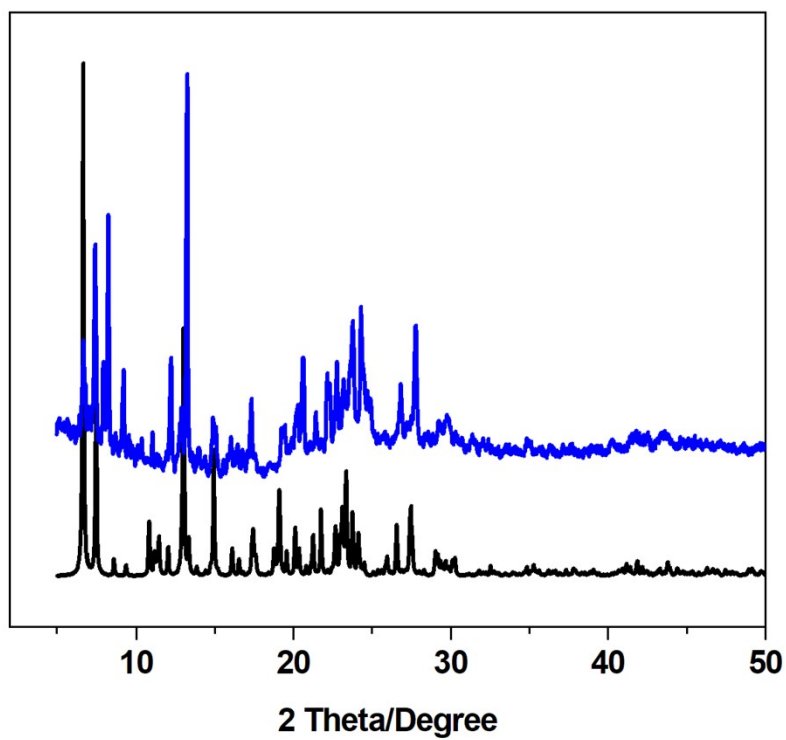

**Fig. S7** PXRD patterns of simulated **Co-CP** (black), as-synthesized **Co-CP** (blue).

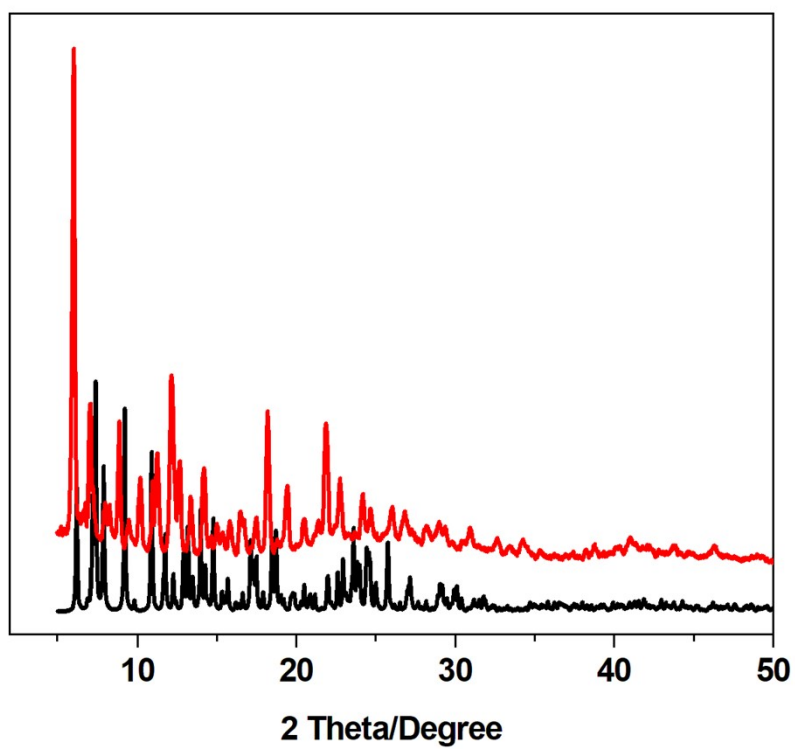

**Fig. S8** PXRD patterns of simulated **Cu-CP** (black), as-synthesized **Cu-CP** (red).

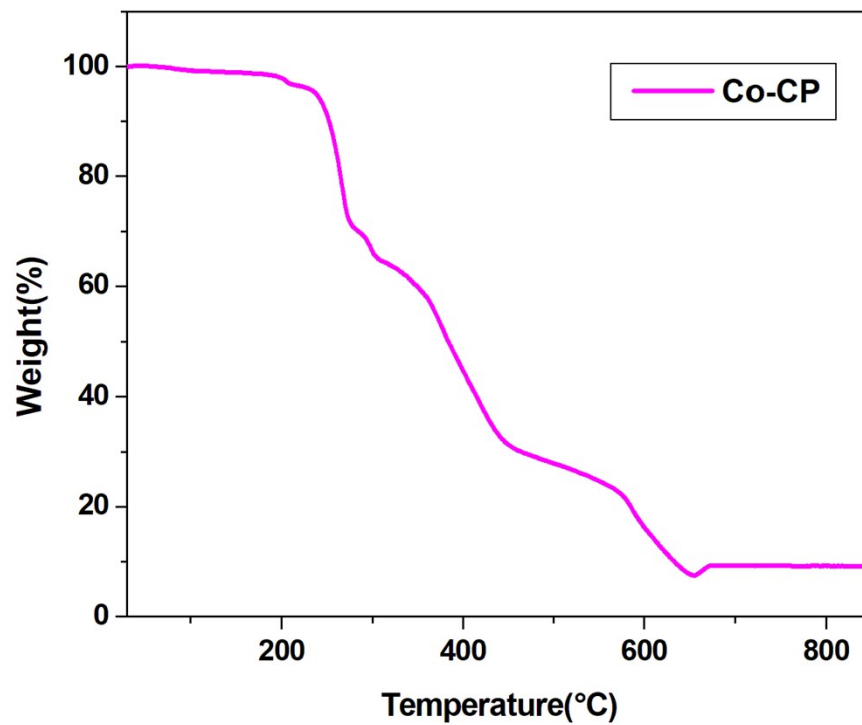

**Fig. S9** TGA plot of Co-CP.

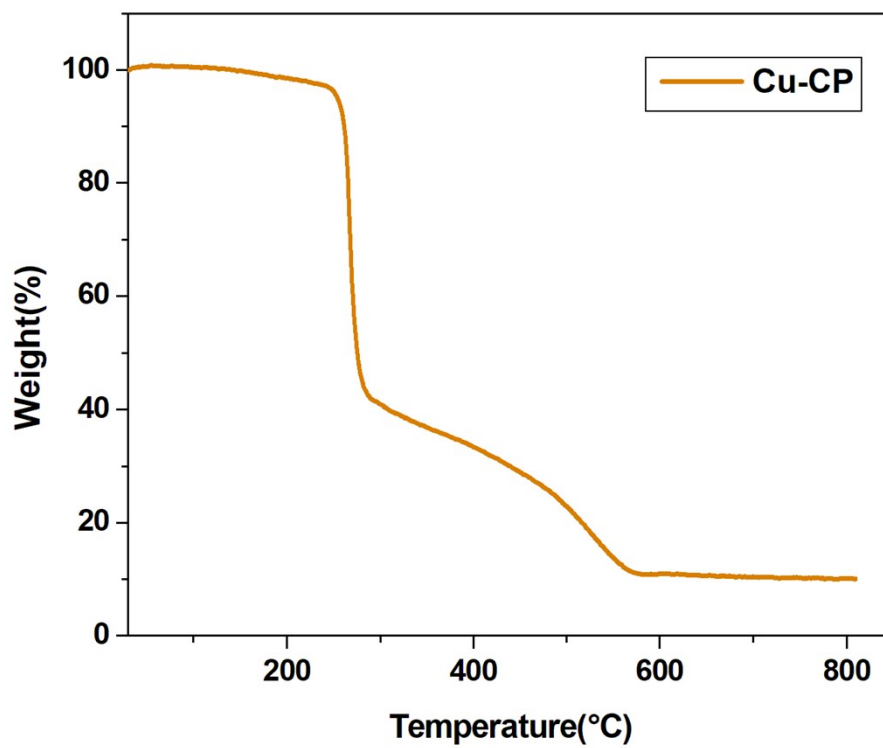

**Fig. S10** TGA plot of Cu-CP.

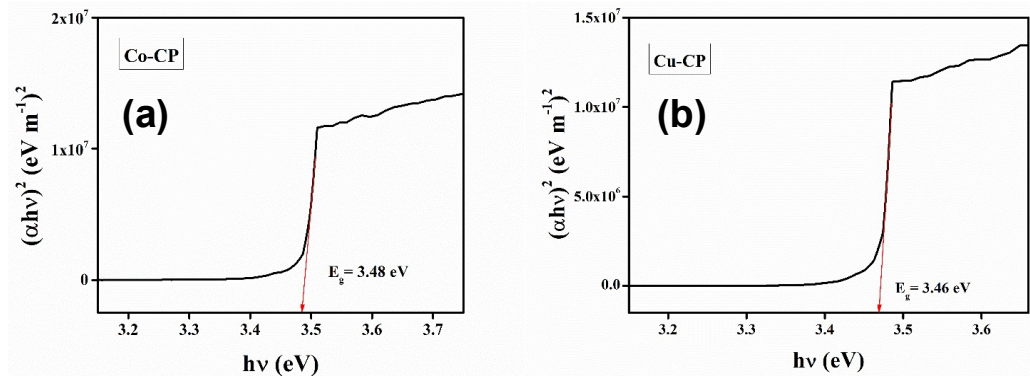

**Fig. S11** Tauc's plots of (a) Co-CP and (b) Cu-CP.

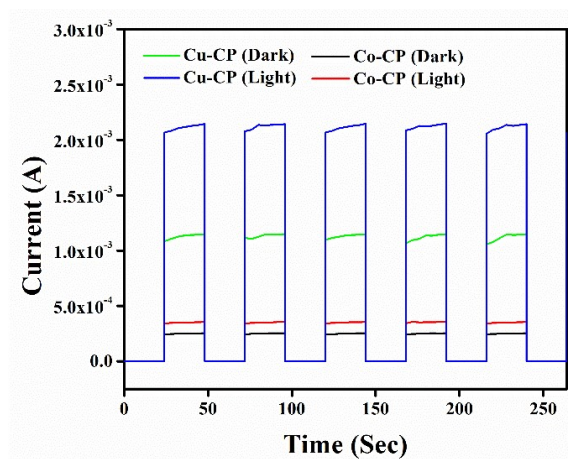

**Fig. S12** Plots of photocurrent vs. time of Co-CP and Cu-CP.

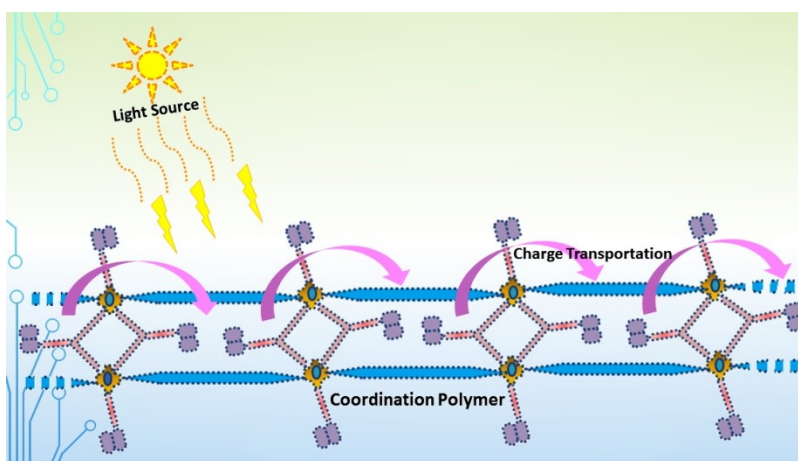

**Scheme S1** Schematic representation of charge transportation mechanism in CP.

## Reference

1. G. M. Sheldrick, *Acta Crystallogr. A*, 2008, **64**, 112–122.
2. K. Naskar, S. Sil, N. Sahu, B. Dutta, A. M. Z. Slawin, P. P. Ray and C. Sinha, *Cryst. Growth Des.*, 2019, **19**, 2632.
3. A. Zaman, P. Das, S. Khan, S. Maity, S. Naaz, S. Islam, P. Ghosh, P. P. Ray and M. H. Mir, *New J. Chem.*, 2019, **43**, 16071.
4. B. Dutta, R. Jana, C. Sinha, P. P. Ray and M. H. Mir, *Inorg. Chem. Front.*, 2018, **5**, 1998.
5. J. P. Collman, J. T. McDevitt, G. T. Yee, M. B. Zisk, J. B. Torrance, W. A. Little, *Synth. Met.*, 1986, **15**, 129-140.
6. Y. Kobayashi, B. Jacobs, M. D. Allendorf and J. R. Long, *Chem. Mater.*, 2010, **22**, 4120.
7. D. Y. Lee, E.-K. Kim, N. K. Shrestha, D. W. Boukhvalov, J. K. Lee and S.-H. Han, *ACS Appl. Mater. Interfaces*, 2015, **7**, 18501.
8. F. Ahmed, S. Halder, B. Dutta, S. Islam, C. Sen, S. Kundu, C. Sinha, P. P. Ray and M. H. Mir, *New J. Chem.*, 2017, **41**, 11317.
9. W. Xue, B.-Y. Wang, J. Zhu, W.-X. Zhang, Y.-B. Zhang, H.-X. Zhao and X.-M. Chen, *Chem. Commun.*, 2011, **47**, 10233.
